# Supplementary material for: Synthesis of Thermo-Responsive Monofunctionalized Diblock Copolymer Worms
Source: MDPI journal article supplement (doi:10.3390/polym15234590), 2023-11-30
Supplement: s1 [file s1]

## Electronic Supplementary Information

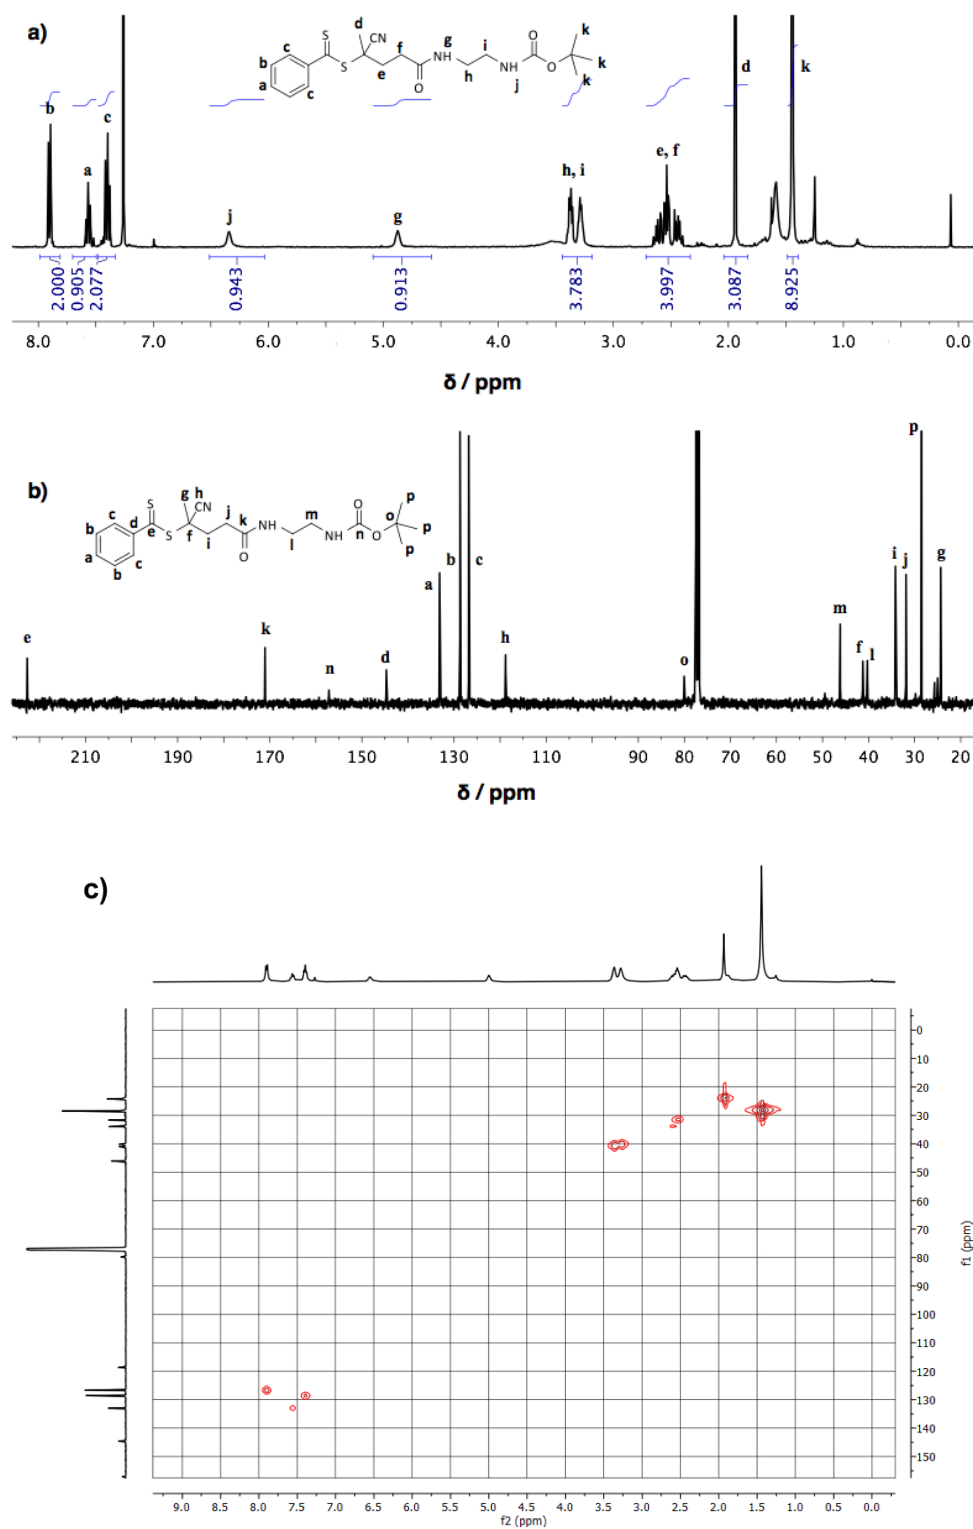

**Figure S1.** a)  $^1\text{H}$ -NMR (400 Hz,  $\text{CDCl}_3$ ), b)  $^{13}\text{C}$ -NMR (400 Hz,  $\text{CDCl}_3$ ) and c) HMQC-NMR (400 Hz,  $\text{CDCl}_3$ ) recorded for 5-(2-(*tert*-butoxycarbonylamino)ethylamino)-2-cyano-5-oxopentan-2-yl benzo-dithioate CTA

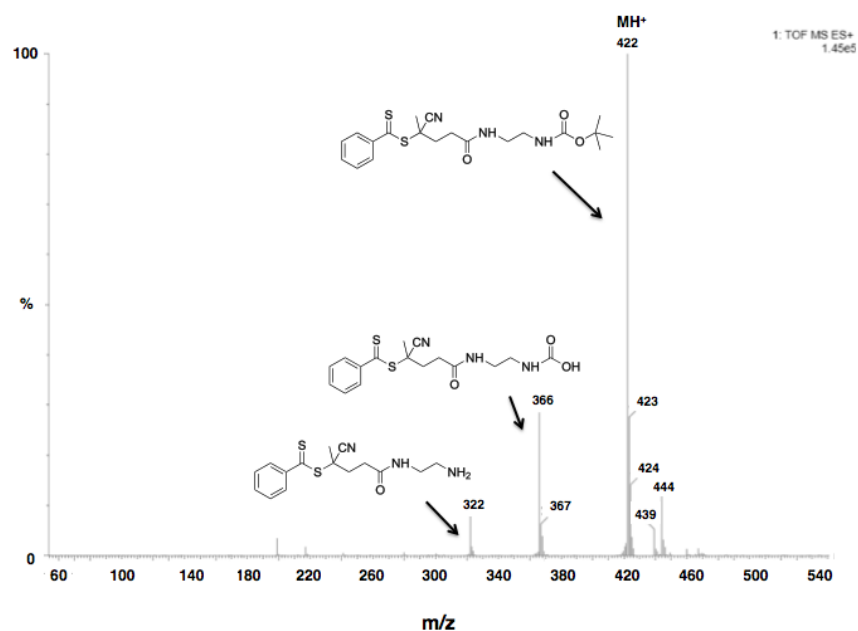

**Figure S2.** Mass spectrum of *t*-Boc CPDB CTA. ESI-MS:  $m/z$  ( $MH^+$ , 100%) 422, and charged fragments generated from the electron ionization.

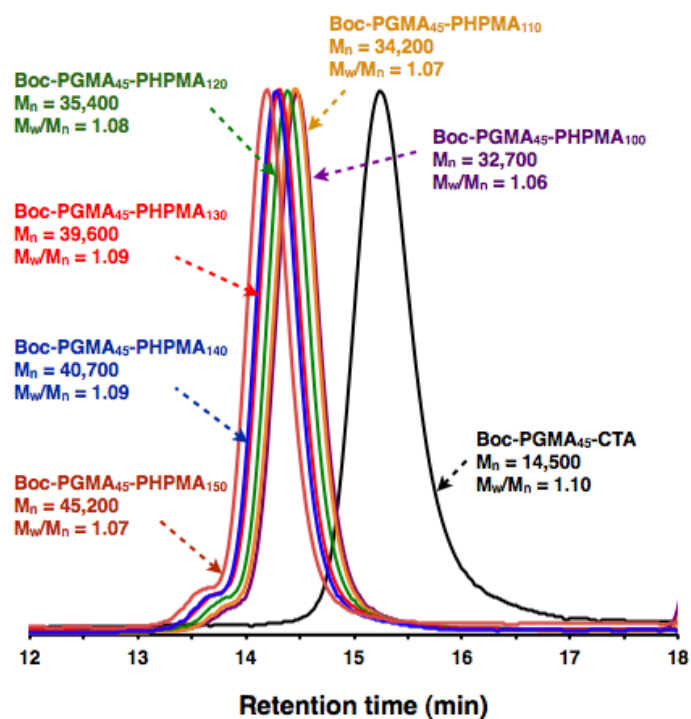

**Figure S3.** DMF GPC curves indicating the molecular weight evolution with elution time for the RAFT copolymerization of HPMA at 70 °C using *t*-Boc PGMA<sub>45</sub> as macro-CTA

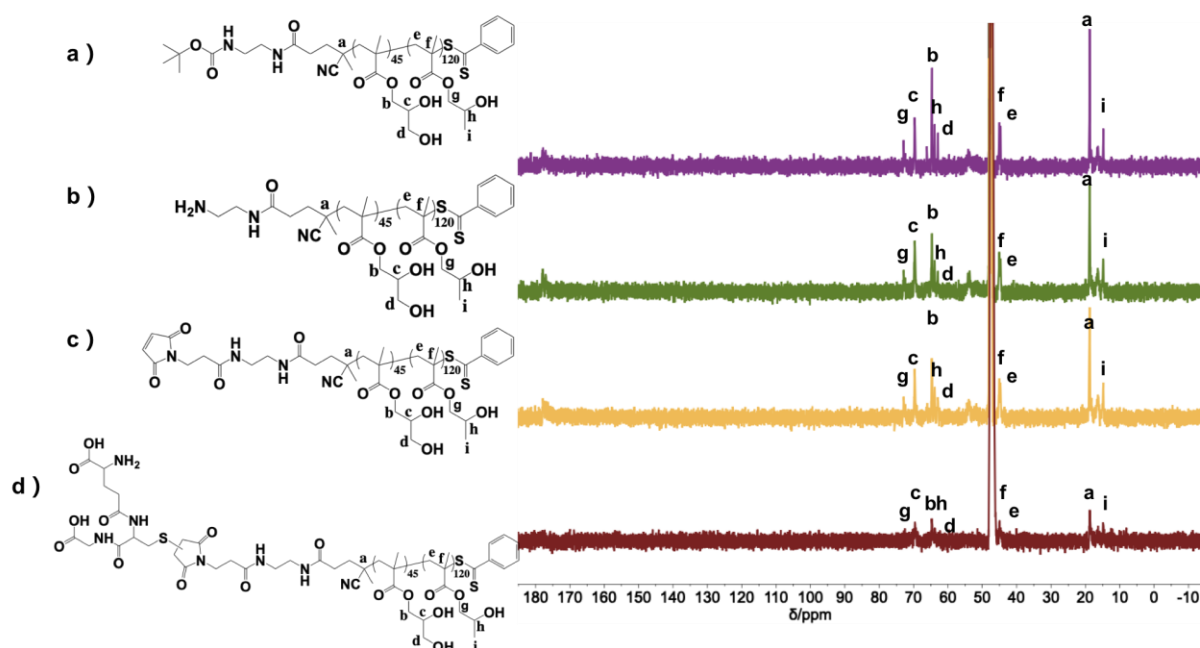

**Figure S4.**  $^{13}\text{C}$ -NMR (600 Hz, d-methanol) spectra recorded for a) *t*-Boc protected PGMA<sub>45</sub>-PHPMA<sub>120</sub> copolymer RAFT polymerized by using *t*-Boc-PGMA<sub>45</sub> macro-CTA in PBS (100 mM, pH 7.4), b)  $\text{NH}_3\text{Cl}$ -PGMA<sub>45</sub>-PHPMA<sub>120</sub> generated with HCl (10 M) in methanol, c) Mal-PGMA<sub>45</sub>-PHPMA<sub>120</sub> copolymer synthesized by reacting  $\text{NH}_3\text{Cl}$ -PGMA<sub>45</sub>-PHPMA<sub>120</sub> with MPA-NHS in anhydrous DMF at room temperature, and d) GSH conjugated PGMA<sub>45</sub>-PHPMA<sub>120</sub> copolymer synthesized in 100 mM PBS (100 mM, pH 7.4) at room temperature.

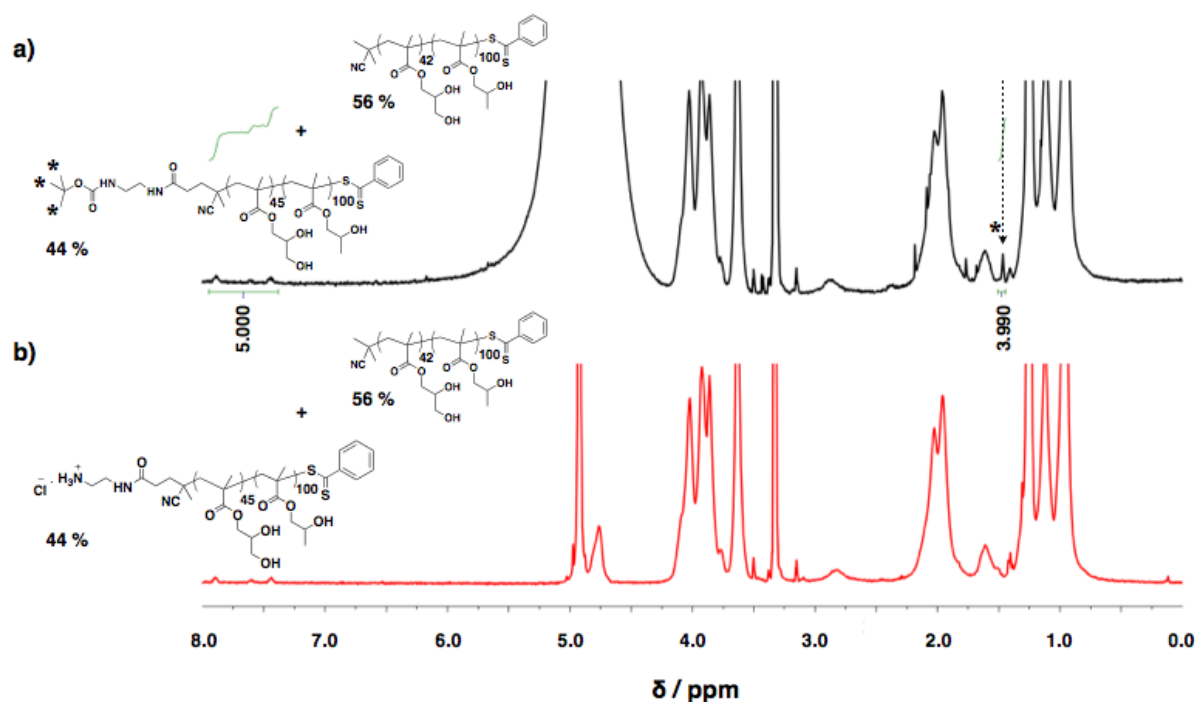

**Figure S5.**  $^1\text{H}$ -NMR spectra of a)  $(0.44t\text{-Boc-PGMA}_{45} + 0.56\text{PGMA}_{42})\text{-PHPMA}_{100}$  and b)  $(0.44\text{NH}_3\text{Cl-PGMA}_{45} + 0.56\text{PGMA}_{42})\text{-PHPMA}_{100}$  copolymers synthesized

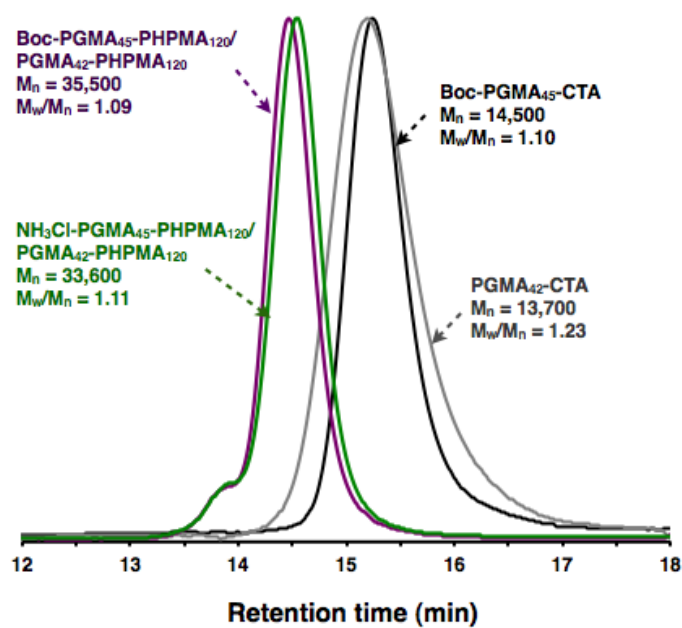

**Figure S6.** Comparison of DMF GPC traces of *t*-Boc-PGMA<sub>45</sub> and PGMA<sub>42</sub> macro-CTA, (0.44*t*-Boc-PGMA<sub>45</sub> + 0.56PGMA<sub>42</sub>)-PHPMA<sub>100</sub> and (0.44NH<sub>3</sub>Cl-PGMA<sub>45</sub> + 0.56PGMA<sub>42</sub>)-PHPMA<sub>100</sub> copolymer worms synthesized
